# Supplementary material for: Cyclen derivatives with two trans-methylnitrophenolic pendant arms: a structural study of their copper(ii) and zinc(ii) complexes
Source: Royal Society of Chemistry journal article supplement (doi:10.1039/c2dt32363j), 2012-12-17
Supplement: c2dt32363j.pdf [file c2dt32363j.pdf]

## Electronic Supplementary Information

### Cyclen derivatives with two *trans*-methylnitrophenolic pendant arms: structural study of their copper(II) and zinc(II) complexes

Catarina V. Esteves,<sup>a</sup> Luís M. P. Lima,<sup>a</sup> Pedro Mateus,<sup>a</sup> Rita Delgado,<sup>\*a</sup> Paula Brandão<sup>b</sup>  
and Vítor Félix<sup>c</sup>

<sup>a</sup> Instituto de Tecnologia Química e Biológica, Universidade Nova de Lisboa, Av. da República, 2780-157 Oeiras, Portugal. Fax: (+351) 21 441 12 77, e-mail: [delgado@itqb.unl.pt](mailto:delgado@itqb.unl.pt).

<sup>b</sup> Departamento de Química, CICECO, Universidade de Aveiro, 3810-193 Aveiro, Portugal.

<sup>c</sup> Departamento de Química, CICECO, and Secção Autónoma de Ciências da Saúde, Universidade de Aveiro, 3810-193 Aveiro, Portugal.

| Contents                                                                                                           | Page |
|--------------------------------------------------------------------------------------------------------------------|------|
| <b>Fig. S1.</b> Experimental and simulated X-band EPR spectrum of [Cu(do2nph)].                                    | S2   |
| <b>Fig. S2.</b> Experimental and simulated X-band EPR spectrum of [Cu(Hdo2nph)] <sup>+</sup> .                     | S2   |
| <b>Fig. S3.</b> Experimental and simulated X-band EPR spectrum of [Cu(H <sub>2</sub> do2nph)] <sup>2+</sup> .      | S3   |
| <b>Fig. S4.</b> Experimental and simulated X-band EPR spectrum of [Cu(cb-do2nph)].                                 | S3   |
| <b>Fig. S5.</b> Experimental and simulated X-band EPR spectrum of [Cu(Hcb-do2nph)] <sup>+</sup> .                  | S4   |
| <b>Fig. S6.</b> <sup>1</sup> H NMR spectra of the zinc(II) complexes of do2nph and cb-do2nph.                      | S5   |
| <b>Fig. S7.</b> <sup>13</sup> C NMR spectrum of the zinc(II) complex of do2nph in DMSO- <i>d</i> <sub>6</sub> .    | S6   |
| <b>Fig. S8.</b> <sup>13</sup> C NMR spectrum of the zinc(II) complex of cb-do2nph in DMSO- <i>d</i> <sub>6</sub> . | S6   |
| <b>Fig. S9.</b> Time course of the dissociation of the copper(II) complex of H <sub>2</sub> -do2nph.               | S7   |
| <b>Fig. S10.</b> Time course of the dissociation of the copper(II) complex of H <sub>2</sub> cb-do2nph.            | S7   |
| <b>Fig. S11.</b> <sup>1</sup> H NMR spectrum of diammonium salt in DMSO- <i>d</i> <sub>6</sub> .                   | S8   |
| <b>Fig. S12.</b> <sup>13</sup> C NMR spectrum of diammonium salt in DMSO- <i>d</i> <sub>6</sub> .                  | S8   |
| <b>Fig. S13.</b> <sup>1</sup> H NMR spectrum of do2nph in D <sub>2</sub> O.                                        | S9   |
| <b>Fig. S14.</b> <sup>13</sup> C NMR spectrum of do2nph in D <sub>2</sub> O                                        | S9   |
| <b>Fig. S15.</b> HMQC spectrum of do2nph in D <sub>2</sub> O.                                                      | S10  |
| <b>Fig. S16.</b> ESI mass spectrum of do2nph in H <sub>2</sub> O/MeOH (9:2).                                       | S10  |
| <b>Fig. S17.</b> <sup>1</sup> H NMR spectrum of cb-do2nph in D <sub>2</sub> O.                                     | S11  |
| <b>Fig. S18.</b> <sup>13</sup> C NMR spectrum of cb-do2nph in D <sub>2</sub> O.                                    | S11  |
| <b>Fig. S19.</b> HMQC spectrum of cb-do2nph in D <sub>2</sub> O.                                                   | S12  |
| <b>Fig. S20.</b> ESI mass spectrum of cb-do2nph in H <sub>2</sub> O/MeOH (9:2).                                    | S12  |

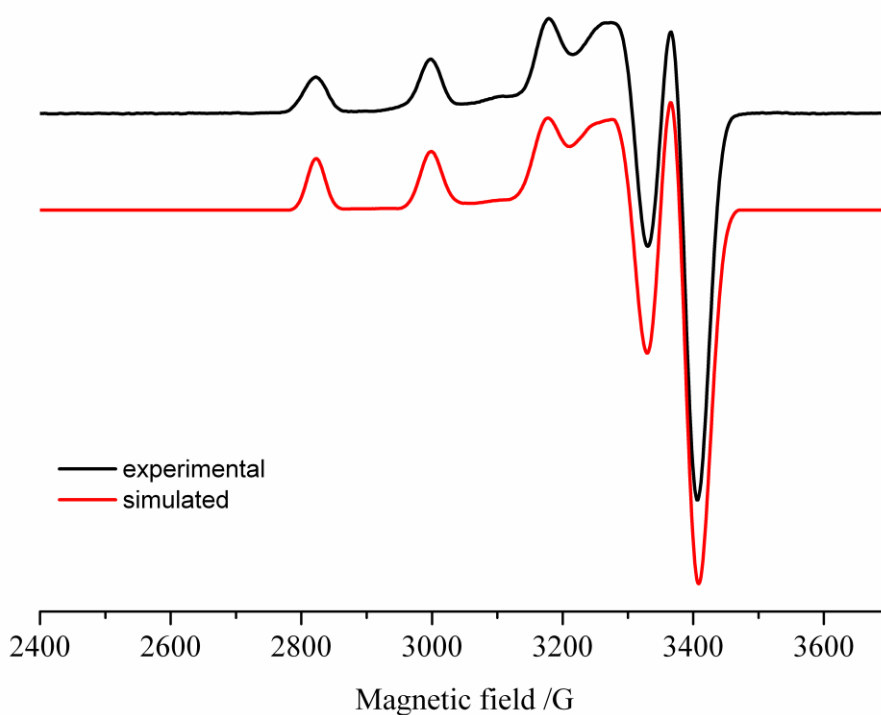

**Fig. S1** Experimental and simulated X-band EPR spectrum of [Cu(do2nph)] complex. The spectrum was recorded in DMSO/H<sub>2</sub>O (9:1) at a microwave power of 2.0 mW, frequency ( $\nu$ ) 9.51 GHz, and  $T = 90$  K.

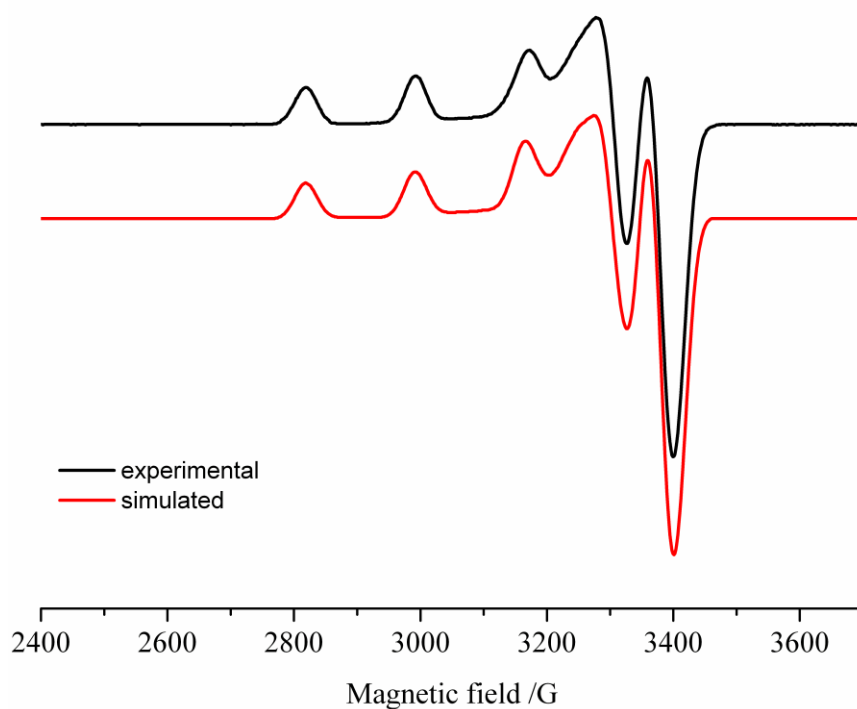

**Fig. S2** Experimental and simulated X-band EPR spectrum of [Cu(Hdo2nph)]<sup>+</sup>. The spectrum was recorded in DMSO/H<sub>2</sub>O (9:1) at a microwave power of 2.0 mW, frequency ( $\nu$ ) 9.51 GHz, and  $T = 90$  K.

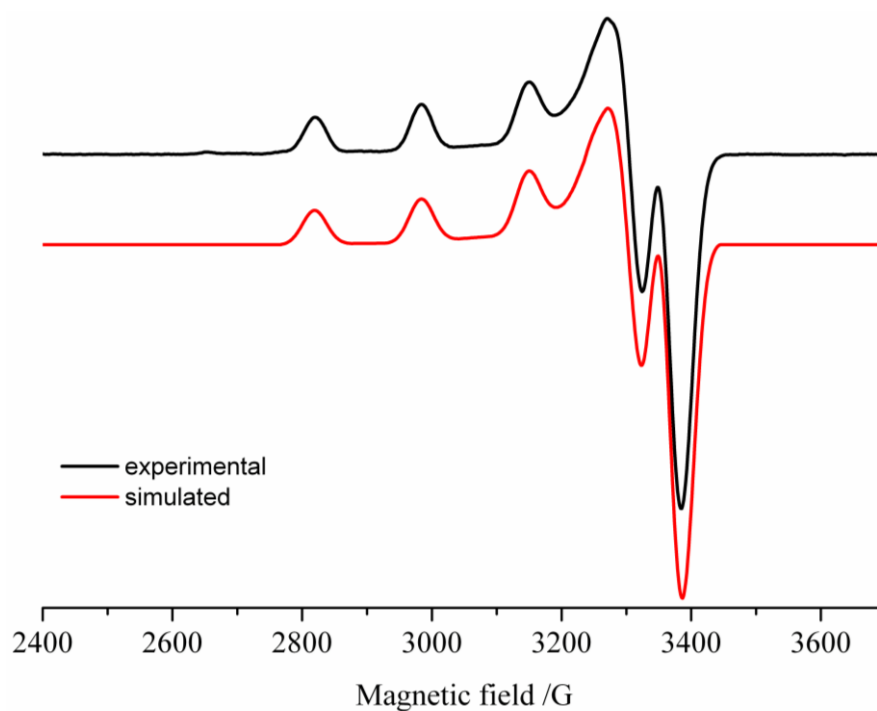

**Fig. S3** Experimental and simulated X-band EPR spectrum of  $[\text{Cu}(\text{H}_2\text{do2nph})]^{2+}$ . The spectrum was recorded in DMSO/ $\text{H}_2\text{O}$  (9:1) at a microwave power of 2.0 mW, frequency ( $\nu$ ) 9.51 GHz, and  $T = 90$  K.

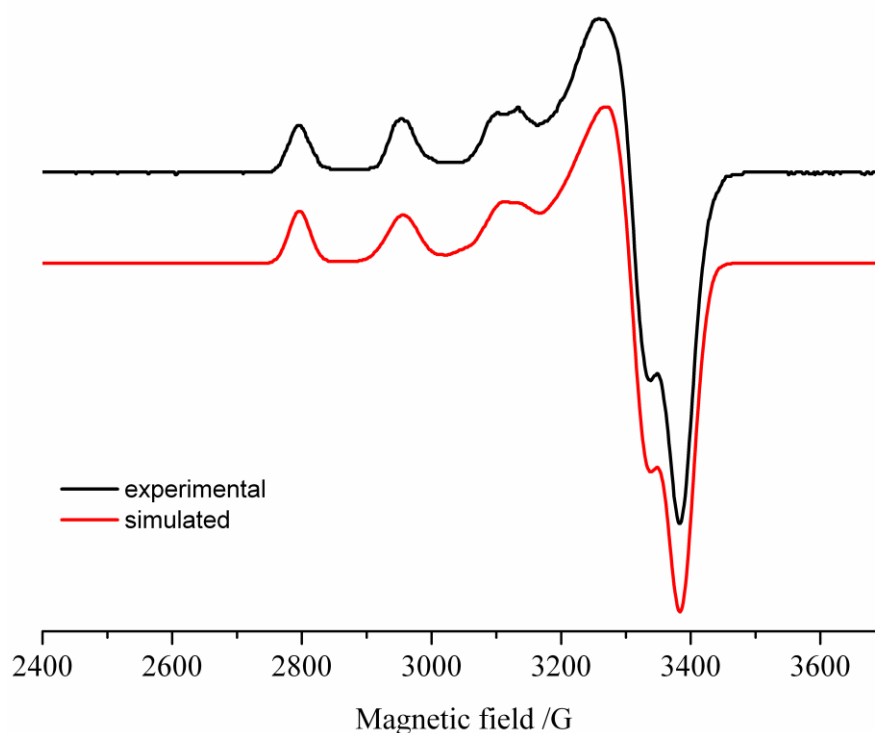

**Fig. S4** Experimental and simulated X-band EPR spectrum of  $[\text{Cu}(\text{cb-do2nph})]$ . The spectrum was recorded in DMSO/ $\text{H}_2\text{O}$  (9:1) at a microwave power of 2.0 mW, frequency ( $\nu$ ) 9.51 GHz, and  $T = 90$  K.

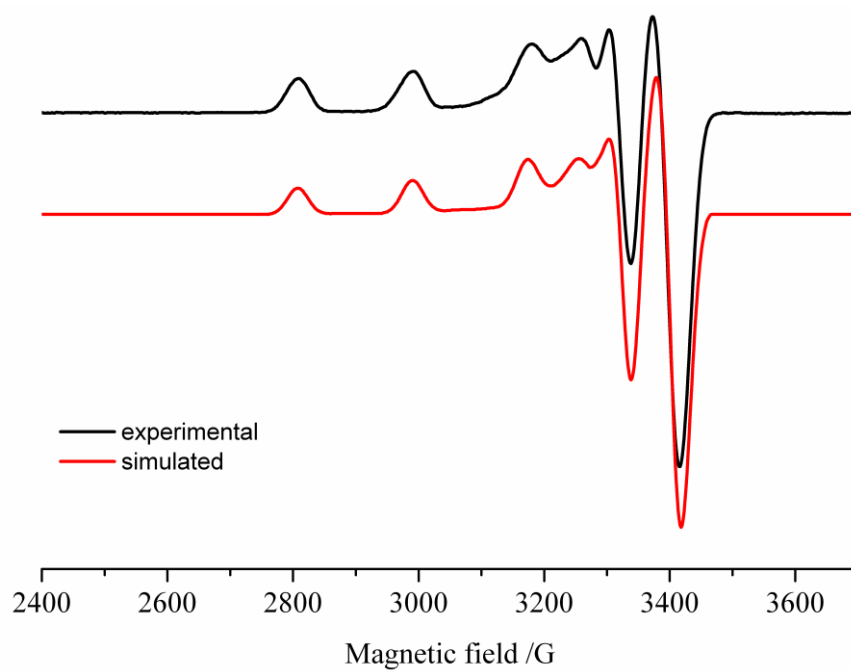

**Fig. S5** Experimental and simulated X-band EPR spectrum of  $[\text{Cu}(\text{Hcb-d}o2\text{nph})]^+$ . The spectrum was recorded in DMSO/ $\text{H}_2\text{O}$  (9:1) at a microwave power of 2.0 mW, frequency ( $\nu$ ) 9.51 GHz, and  $T = 90$  K.

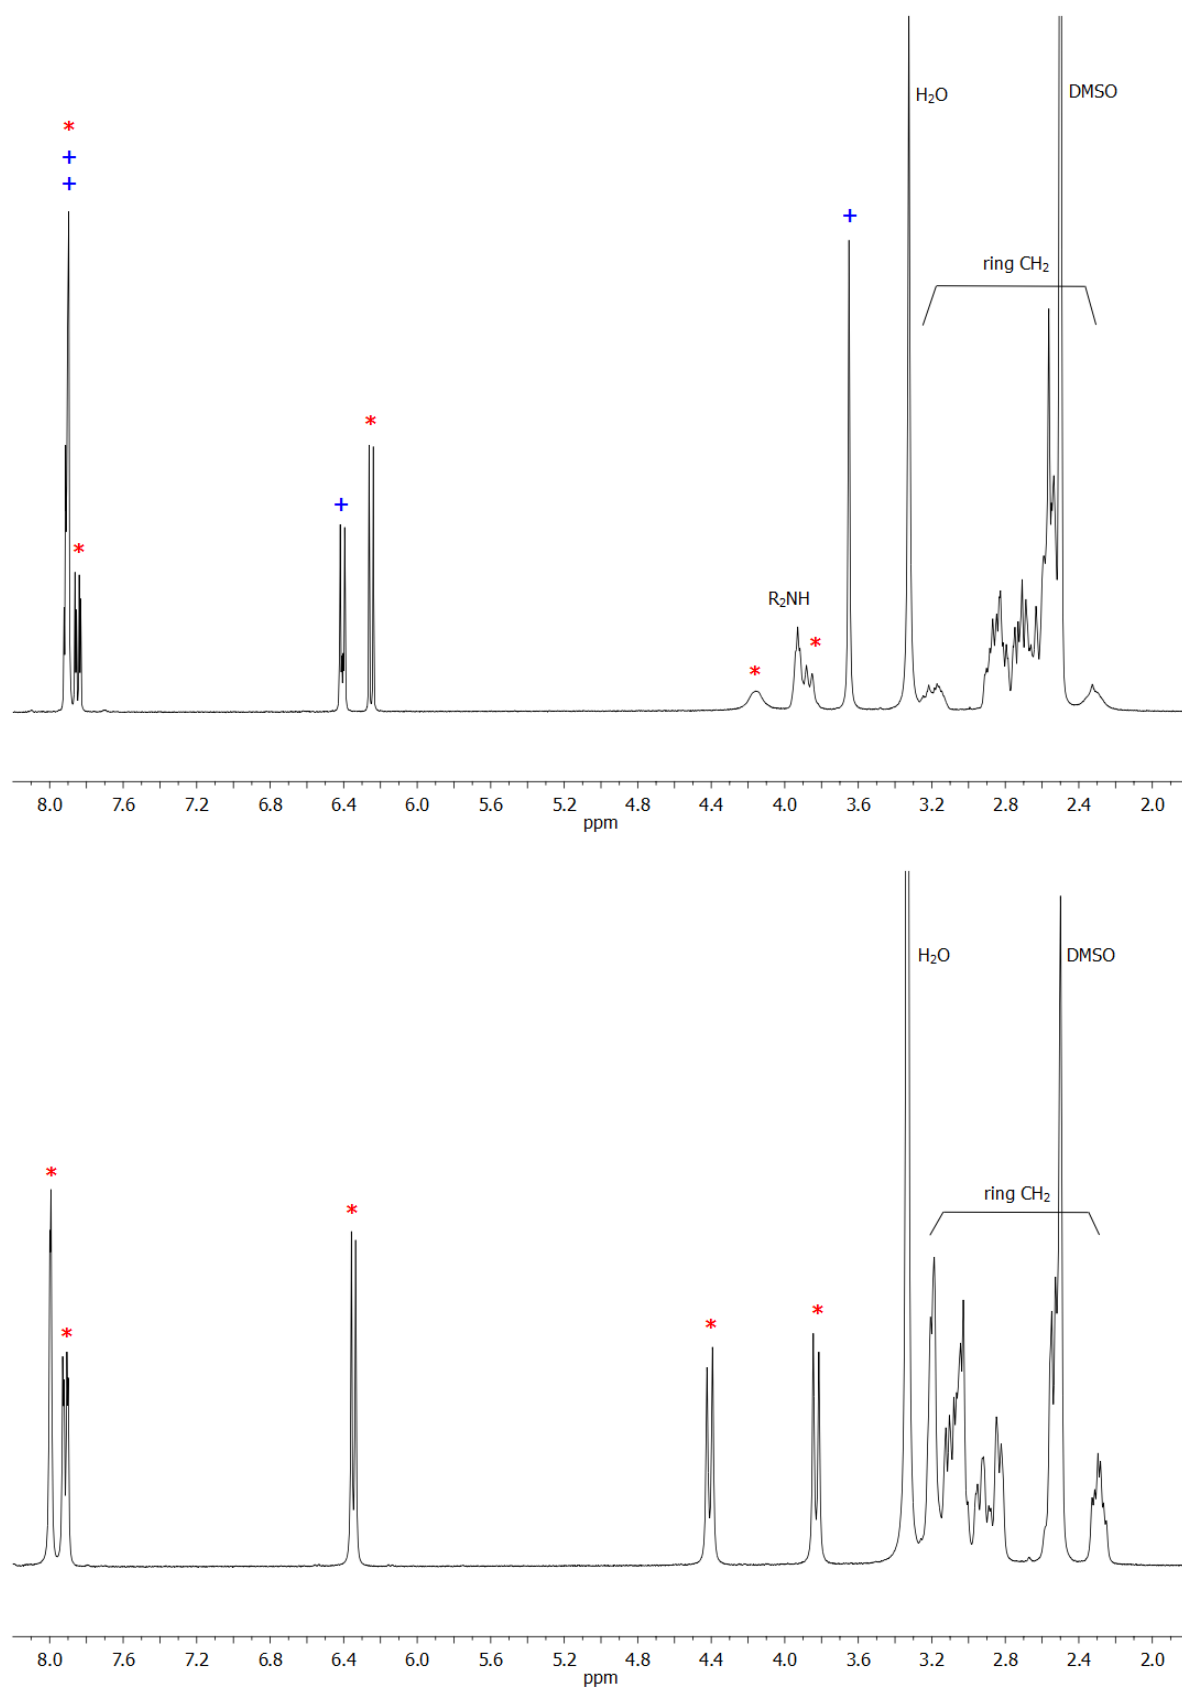

**Fig. S6**  $^1\text{H}$  NMR spectra of the zinc(II) complexes of do2nph (top) and cb-do2nph (bottom) in DMSO- $d_6$ , with labelling of the coordinated pendant arm resonances (\*) and uncoordinated ones (+).

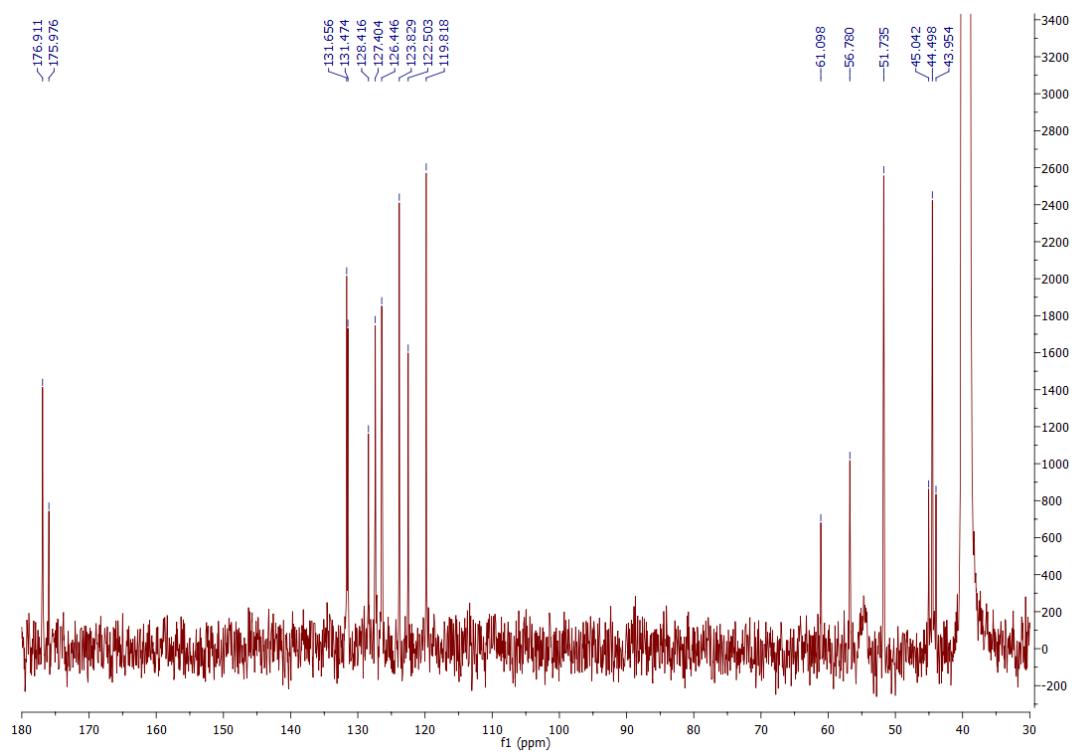

**Fig. S7**  $^{13}\text{C}$  NMR spectrum of the zinc(II) complex of  $\text{H}_2\text{do2nph}$  in  $\text{DMSO-}d_6$ .

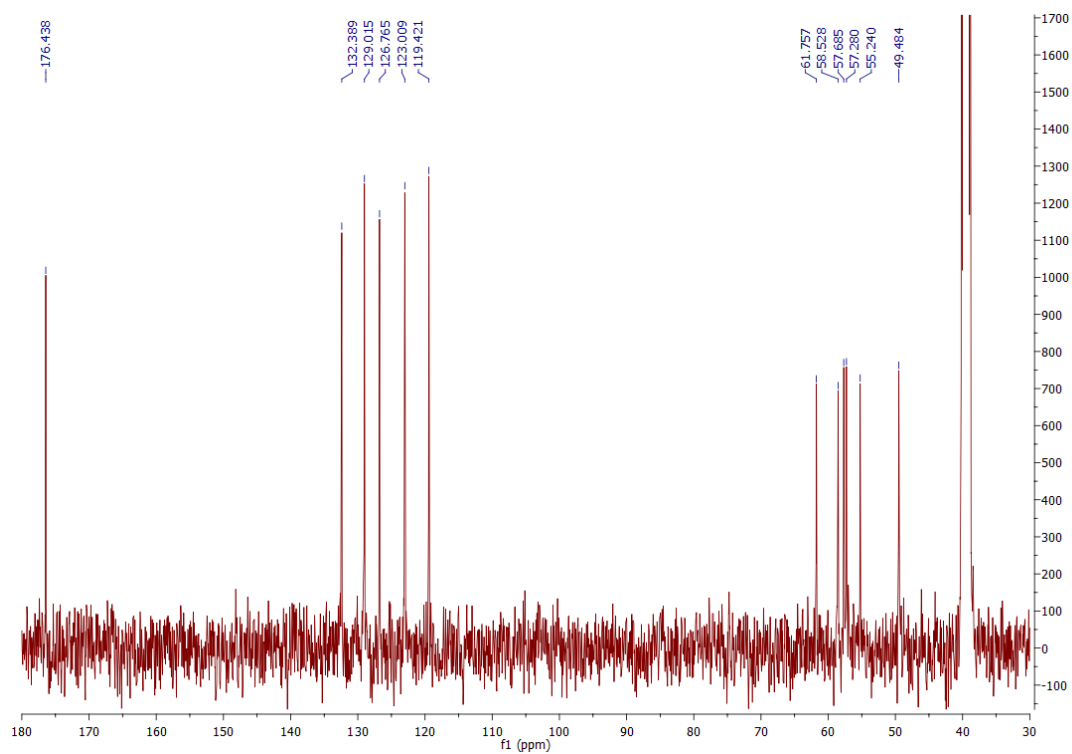

**Fig. S8**  $^{13}\text{C}$  NMR spectrum of the zinc(II) complex of  $\text{H}_2\text{cb-do2nph}$  in  $\text{DMSO-}d_6$ .

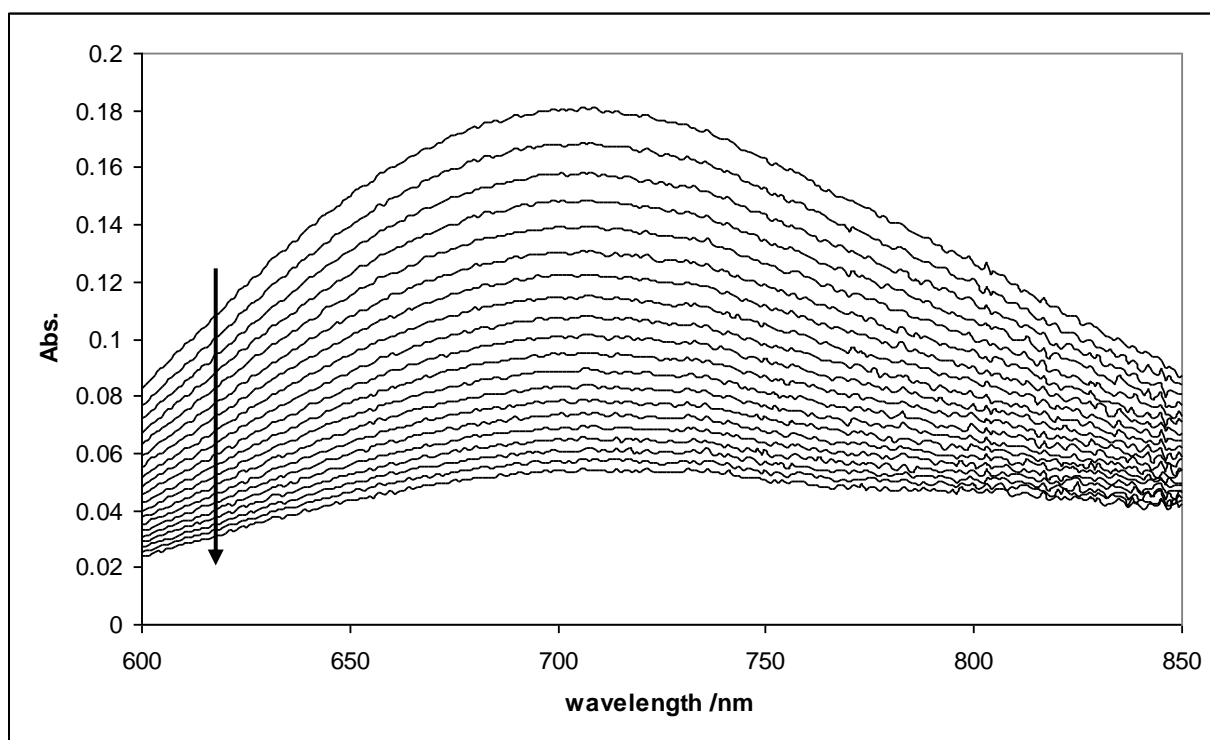

**Fig. S9** Time course of the dissociation of the copper(II) complex of H<sub>2</sub>-do2nph in 1 mol dm<sup>-3</sup> HCl DMSO/H<sub>2</sub>O 9:1 (v/v) solution at 298.2 K, followed at 1 min intervals.

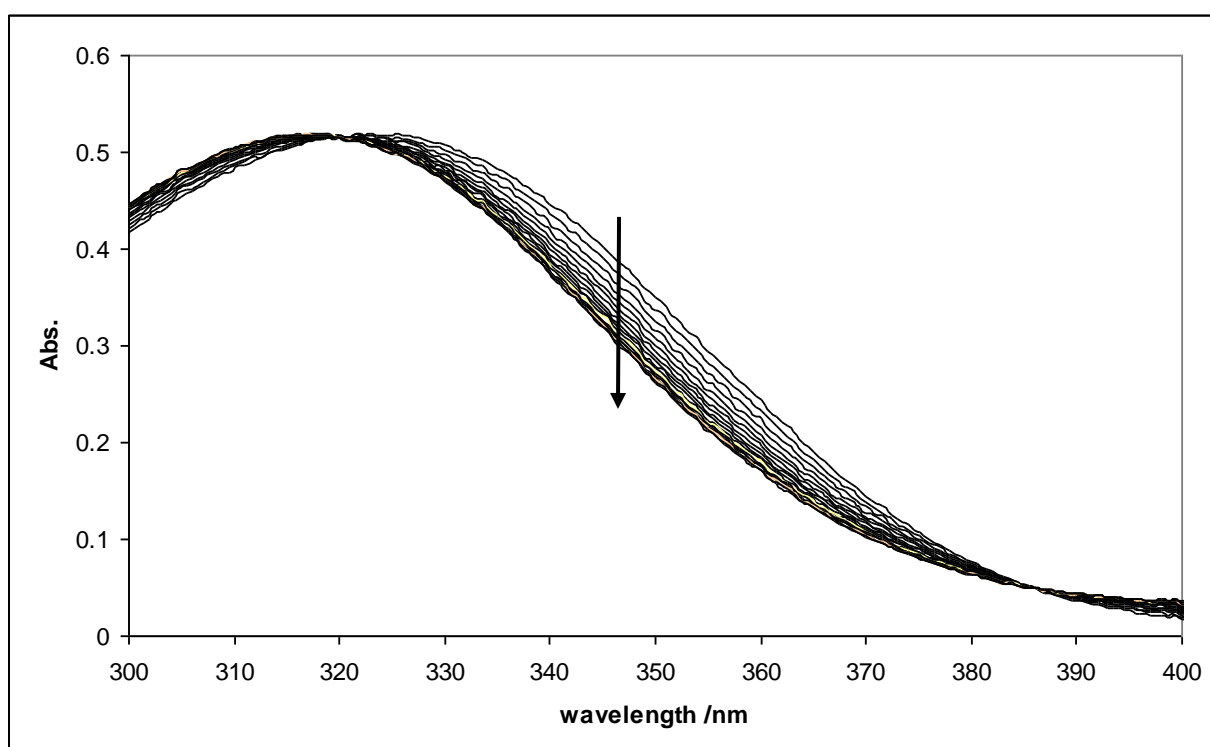

**Fig. S10** Time course of the dissociation of the copper(II) complex of H<sub>2</sub>cb-do2nph in 1 mol dm<sup>-3</sup> HCl DMSO/H<sub>2</sub>O 9:1 (v/v) solution at 298.2 K, followed at 10 min intervals.

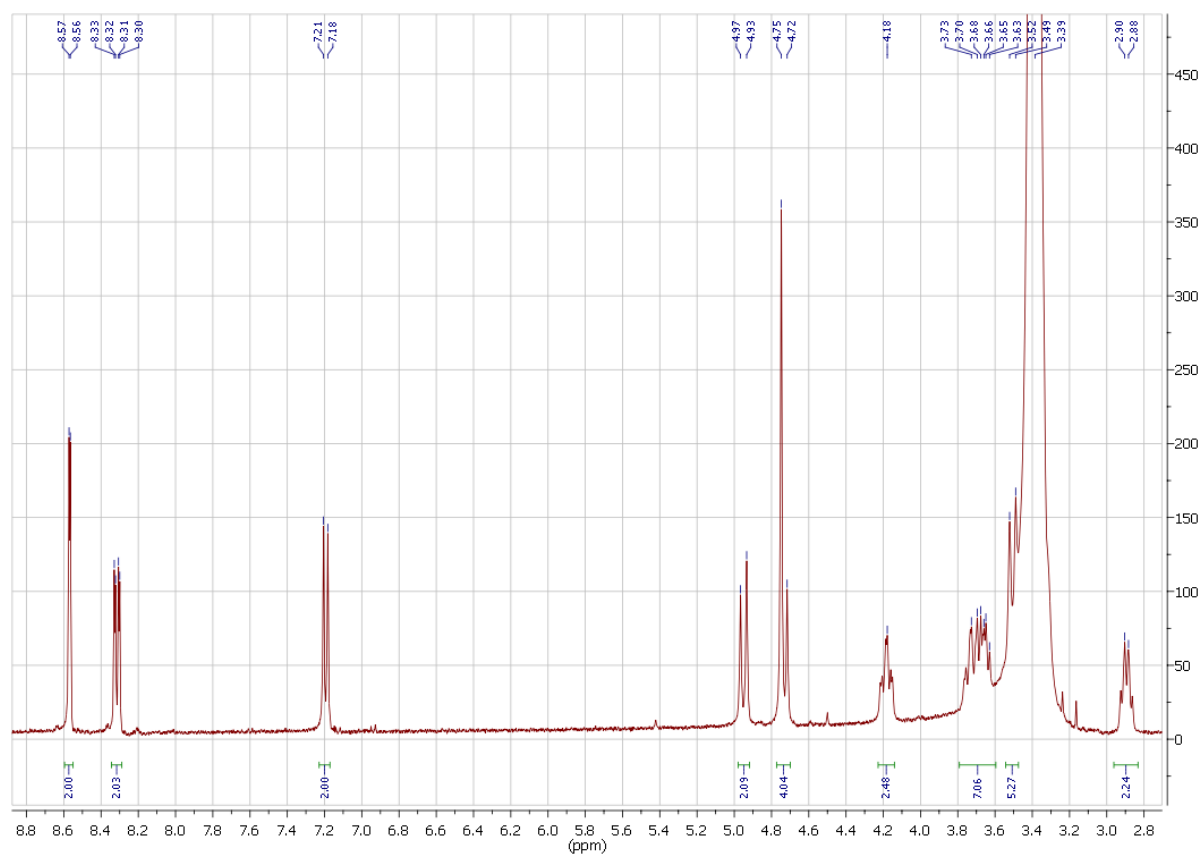

**Fig. S11** <sup>1</sup>H NMR spectrum of diammonium salt (3) in DMSO-*d*<sub>6</sub>.

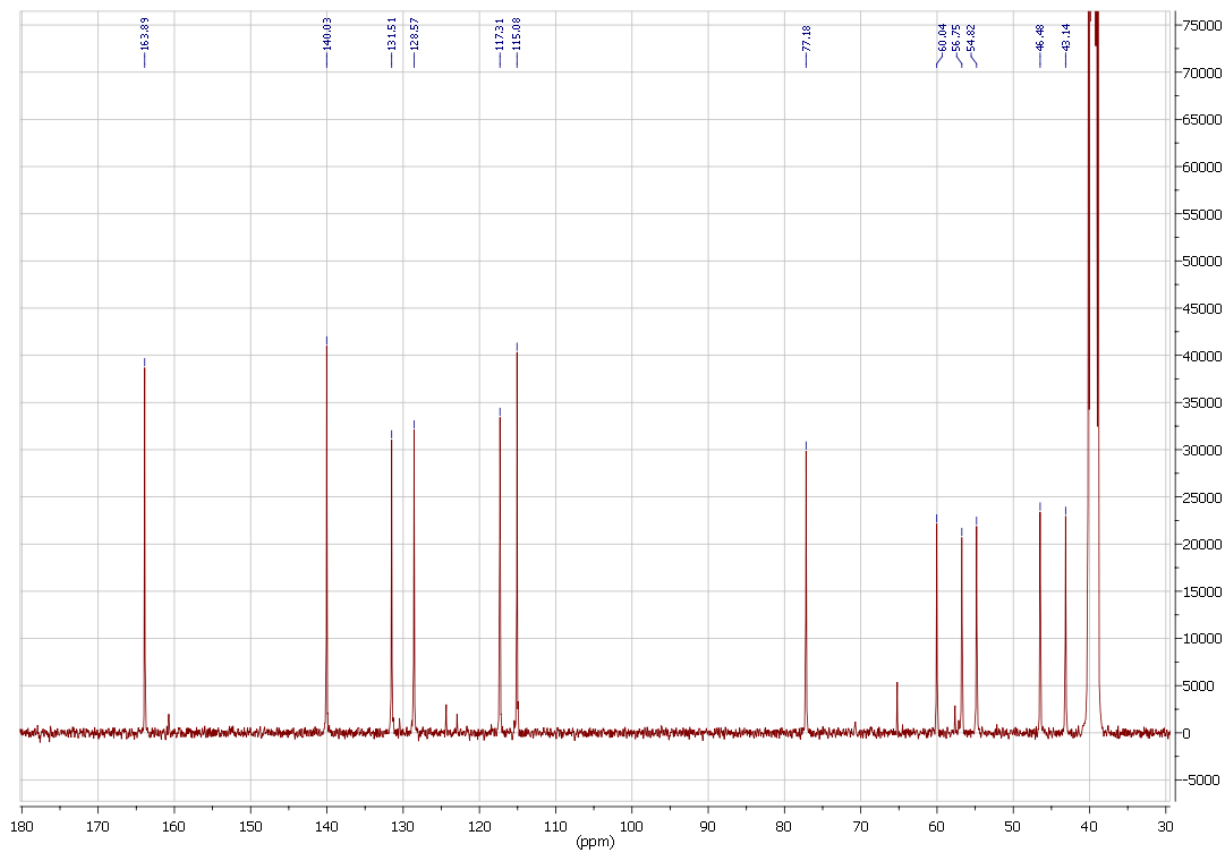

**Fig. S12** <sup>13</sup>C NMR spectrum of diammonium salt (3) in DMSO-*d*<sub>6</sub>.

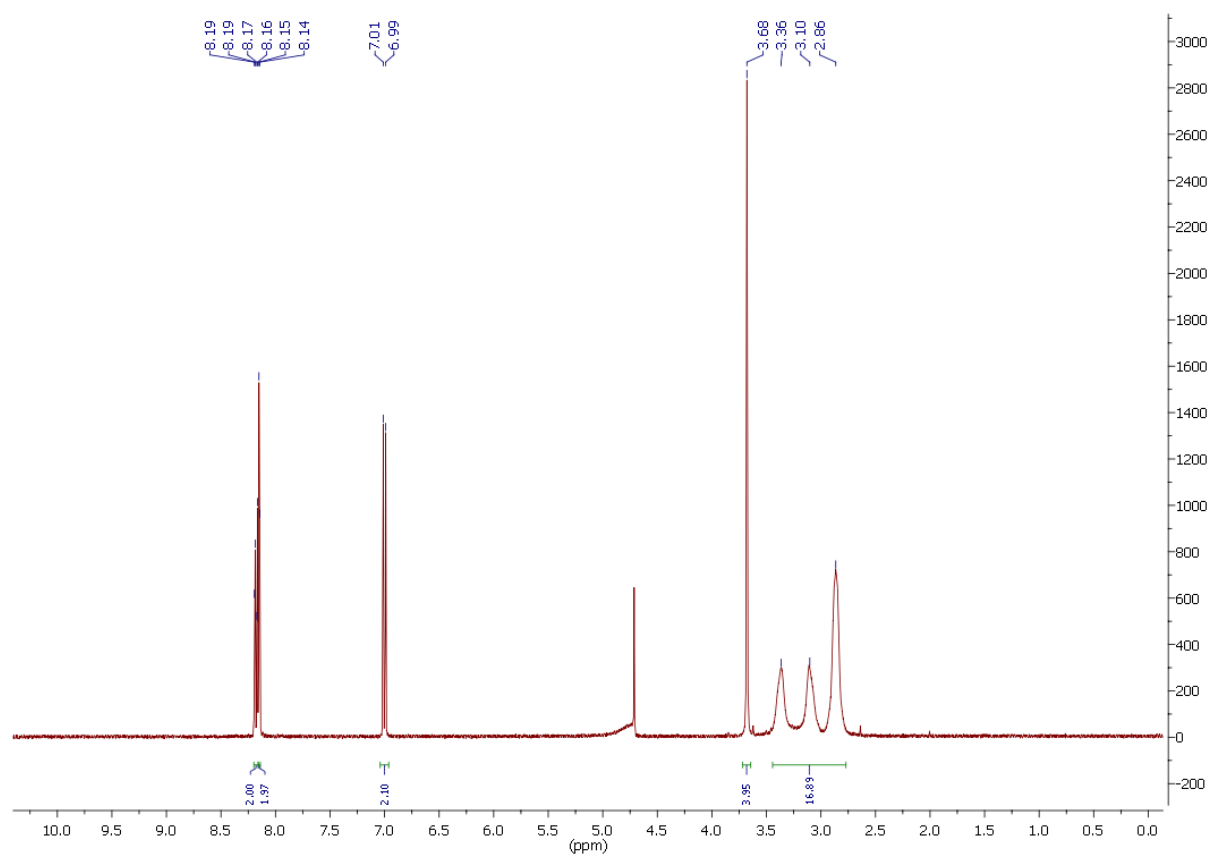

**Fig. S13** <sup>1</sup>H NMR spectrum of do2nph in D<sub>2</sub>O.

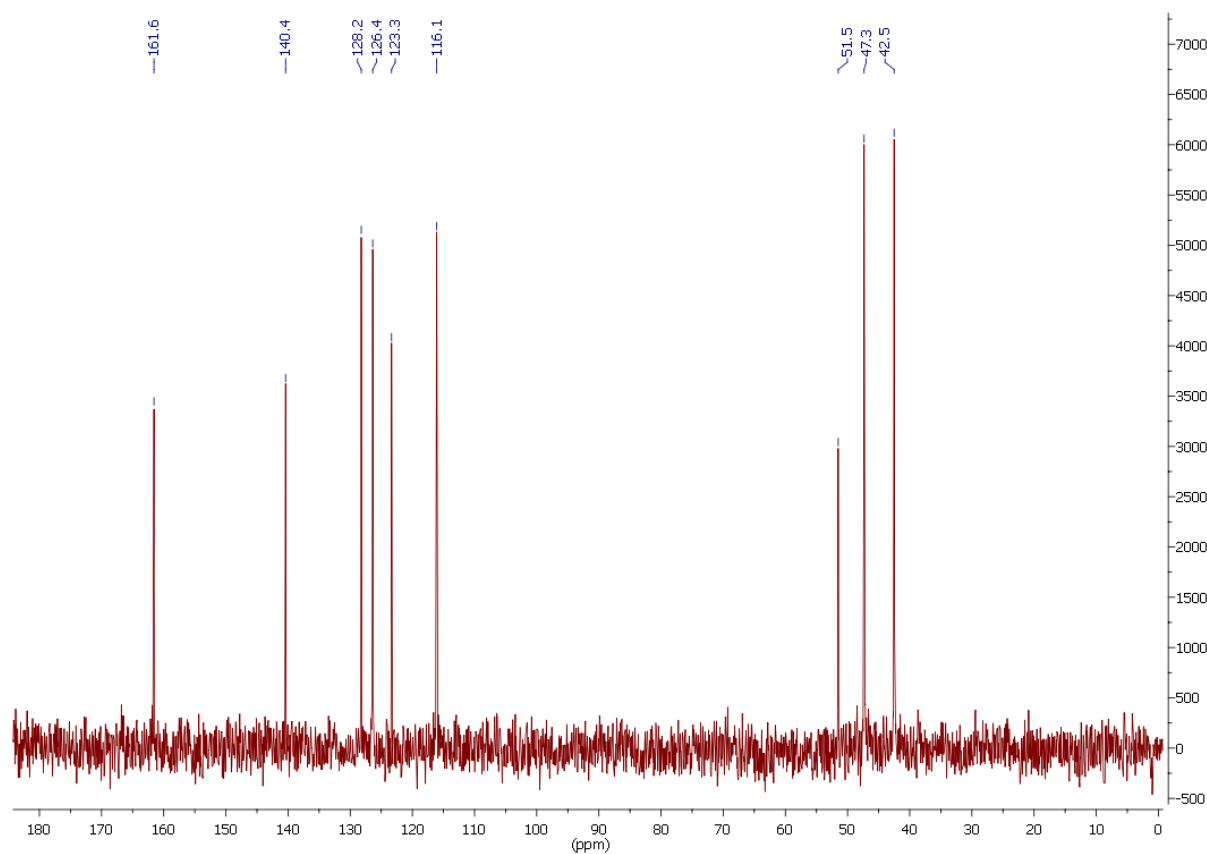

**Fig. S14** <sup>13</sup>C NMR spectrum of do2nph in D<sub>2</sub>O.

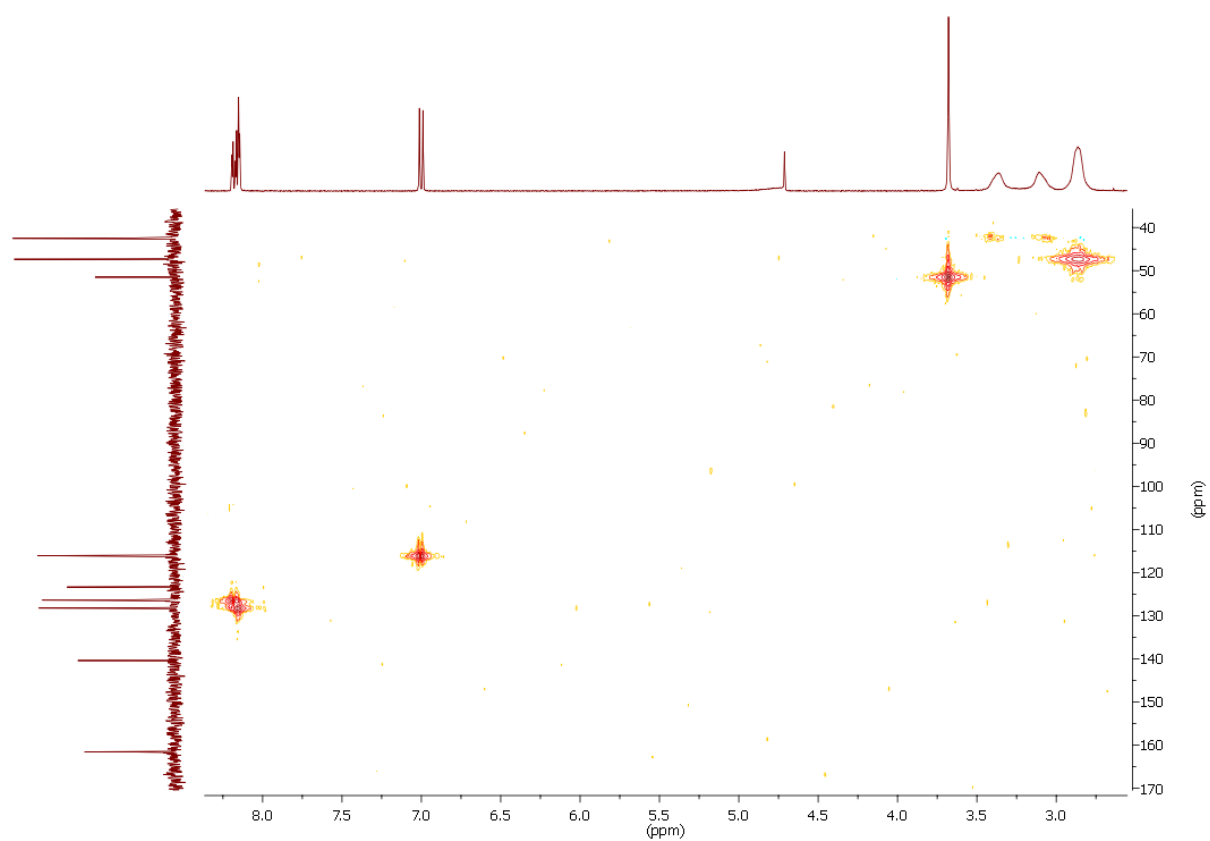

**Fig. S15** HMQC spectrum of do2nph in D<sub>2</sub>O.

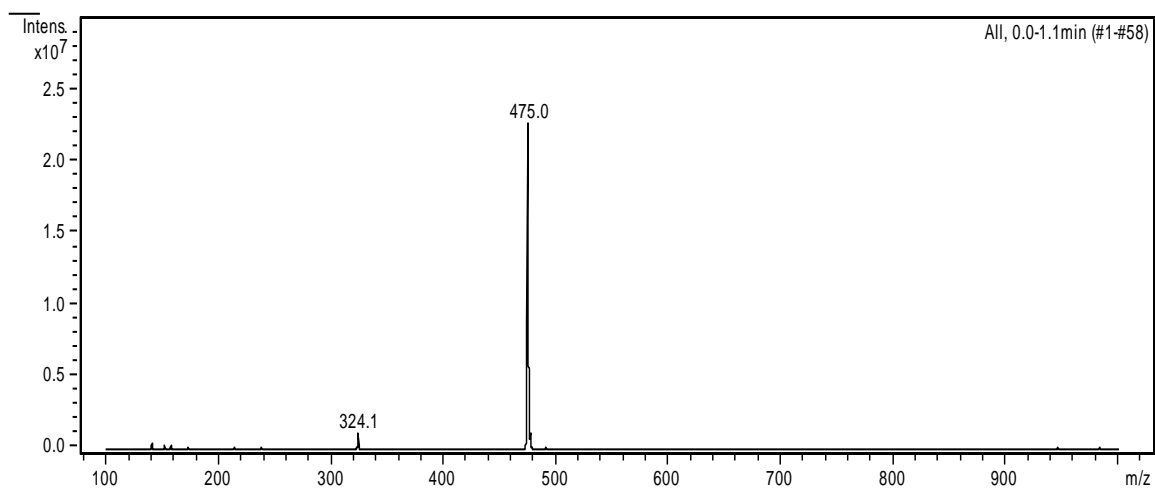

**Fig. S16** ESI mass spectrum of do2nph in H<sub>2</sub>O/MeOH (9:2).

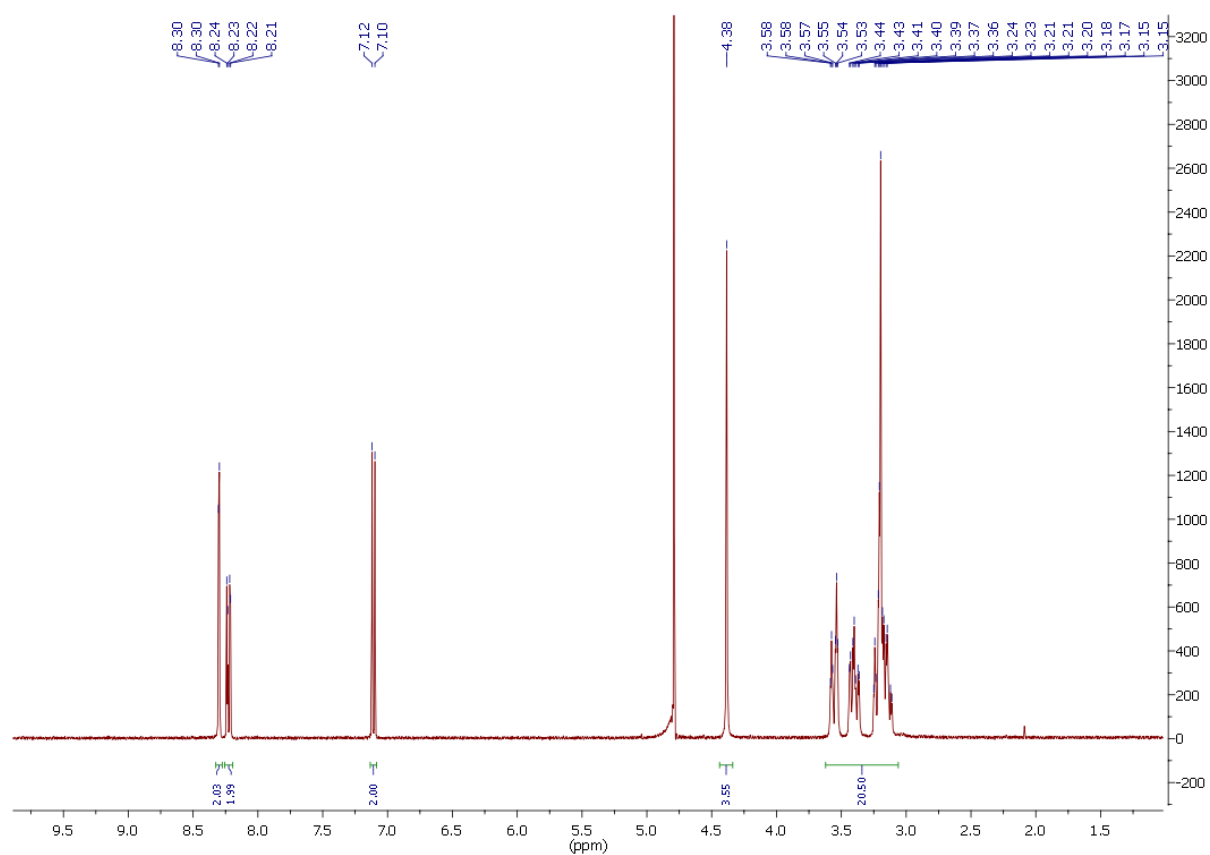

**Fig. S17** <sup>1</sup>H NMR spectrum of cb-do2nph in D<sub>2</sub>O.

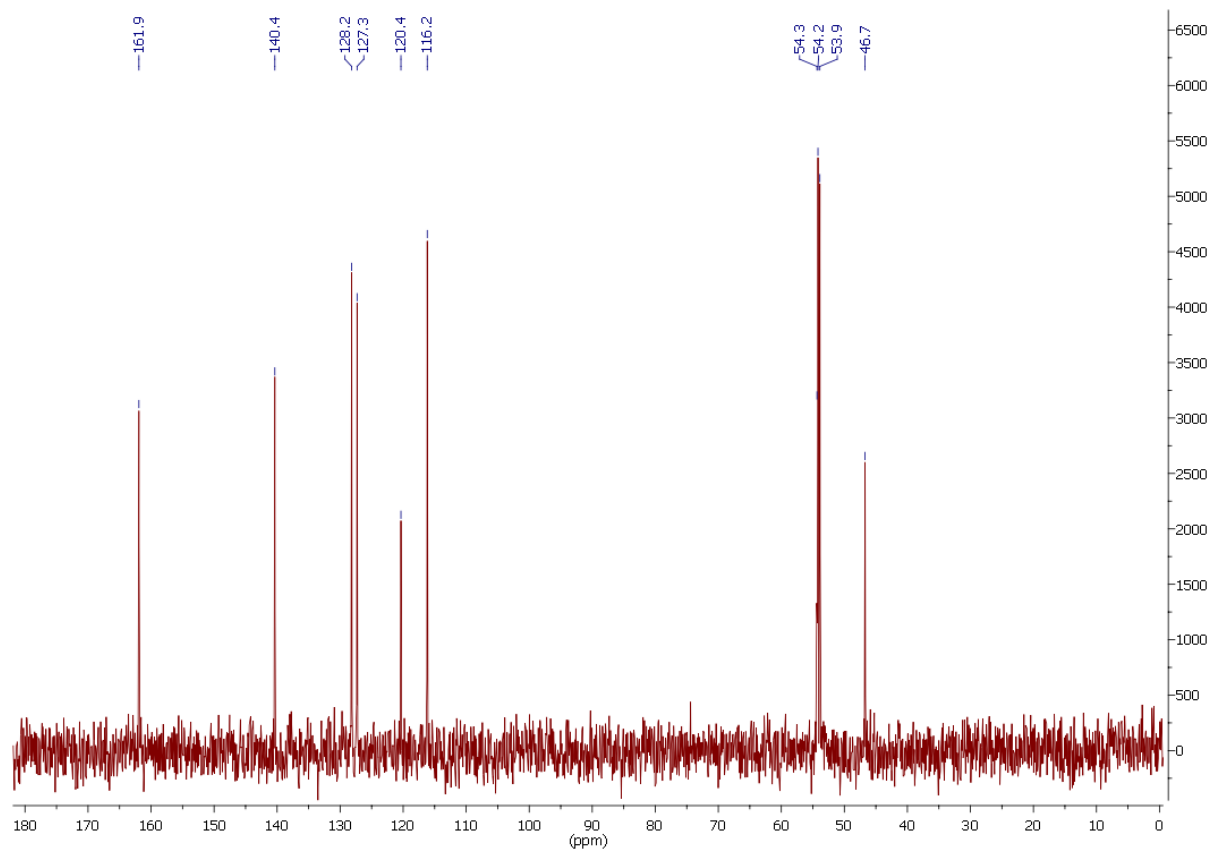

**Fig. S18** <sup>13</sup>C NMR spectrum of cb-do2nph in D<sub>2</sub>O.

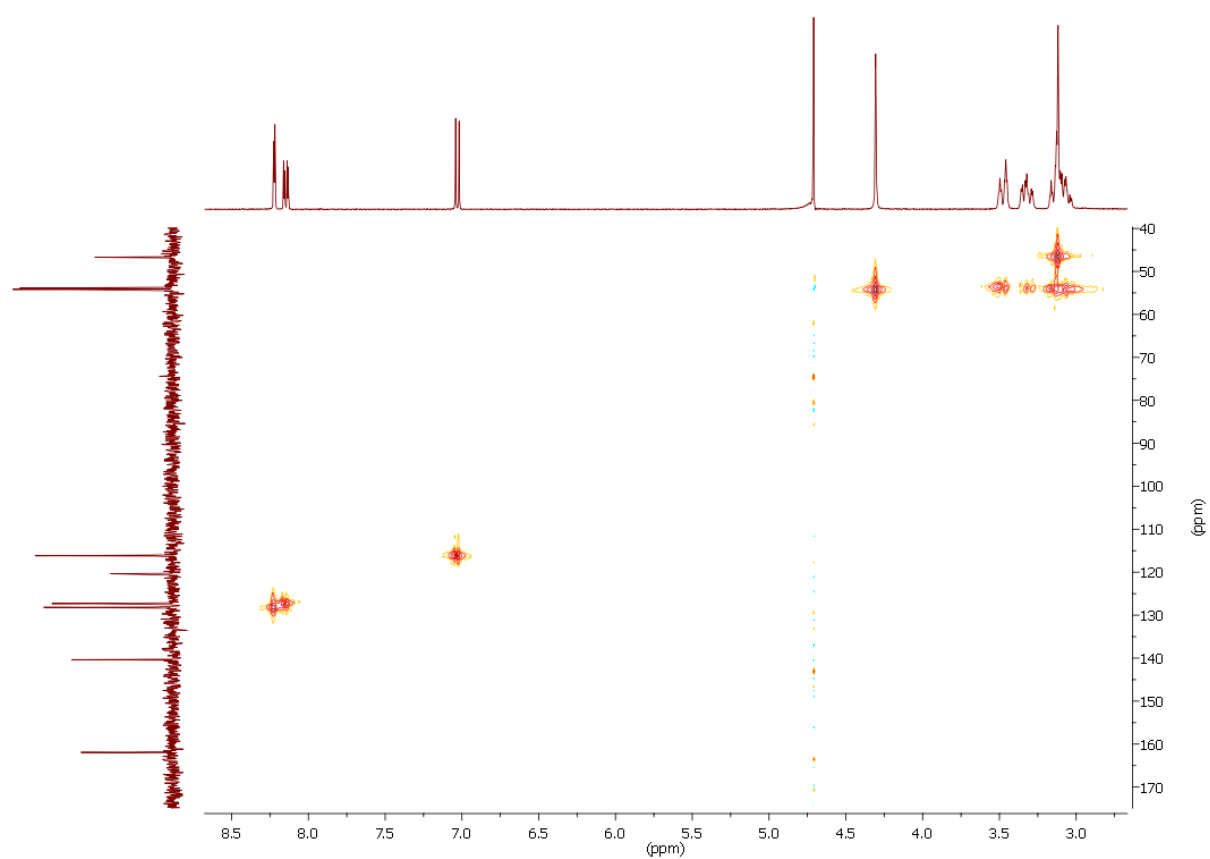

**Fig. S19** HMQC spectrum of cb-do2nph in D<sub>2</sub>O.

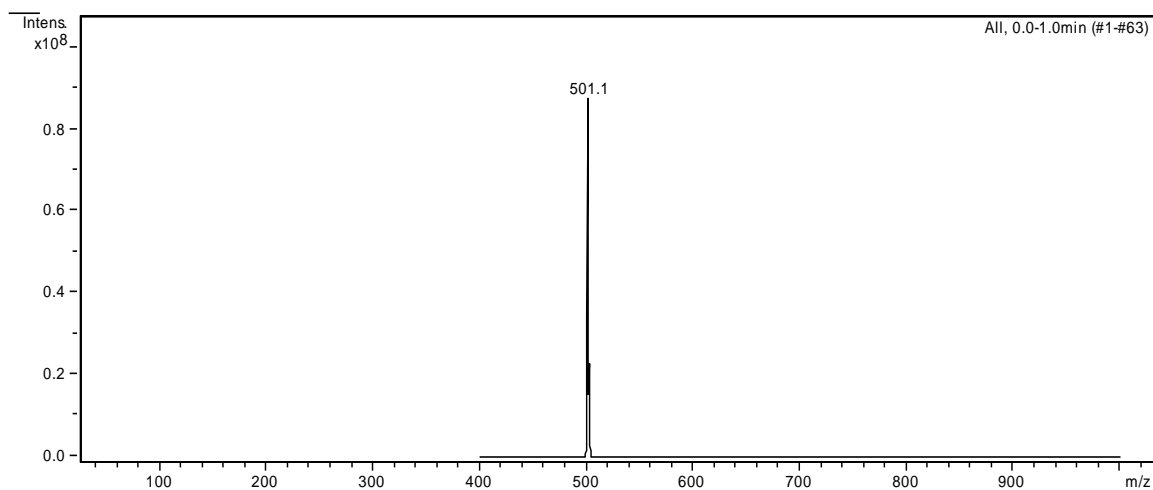

**Fig. S20** ESI mass spectrum of cb-do2nph in H<sub>2</sub>O/MeOH (9:2).
